# Supplementary material for: MiR-21-5p in urinary extracellular vesicles is a novel biomarker of urothelial carcinoma
Source: PubMed Central journal article supplement (PMC5421878; doi:10.18632/oncotarget.14969), 2017-02-01
Supplement: oncotarget-08-24668-s001.pdf [file oncotarget-08-24668-s001.pdf]

# MiR-21-5p in urinary extracellular vesicles is a novel biomarker of urothelial carcinoma

## SUPPLEMENTARY FIGURES

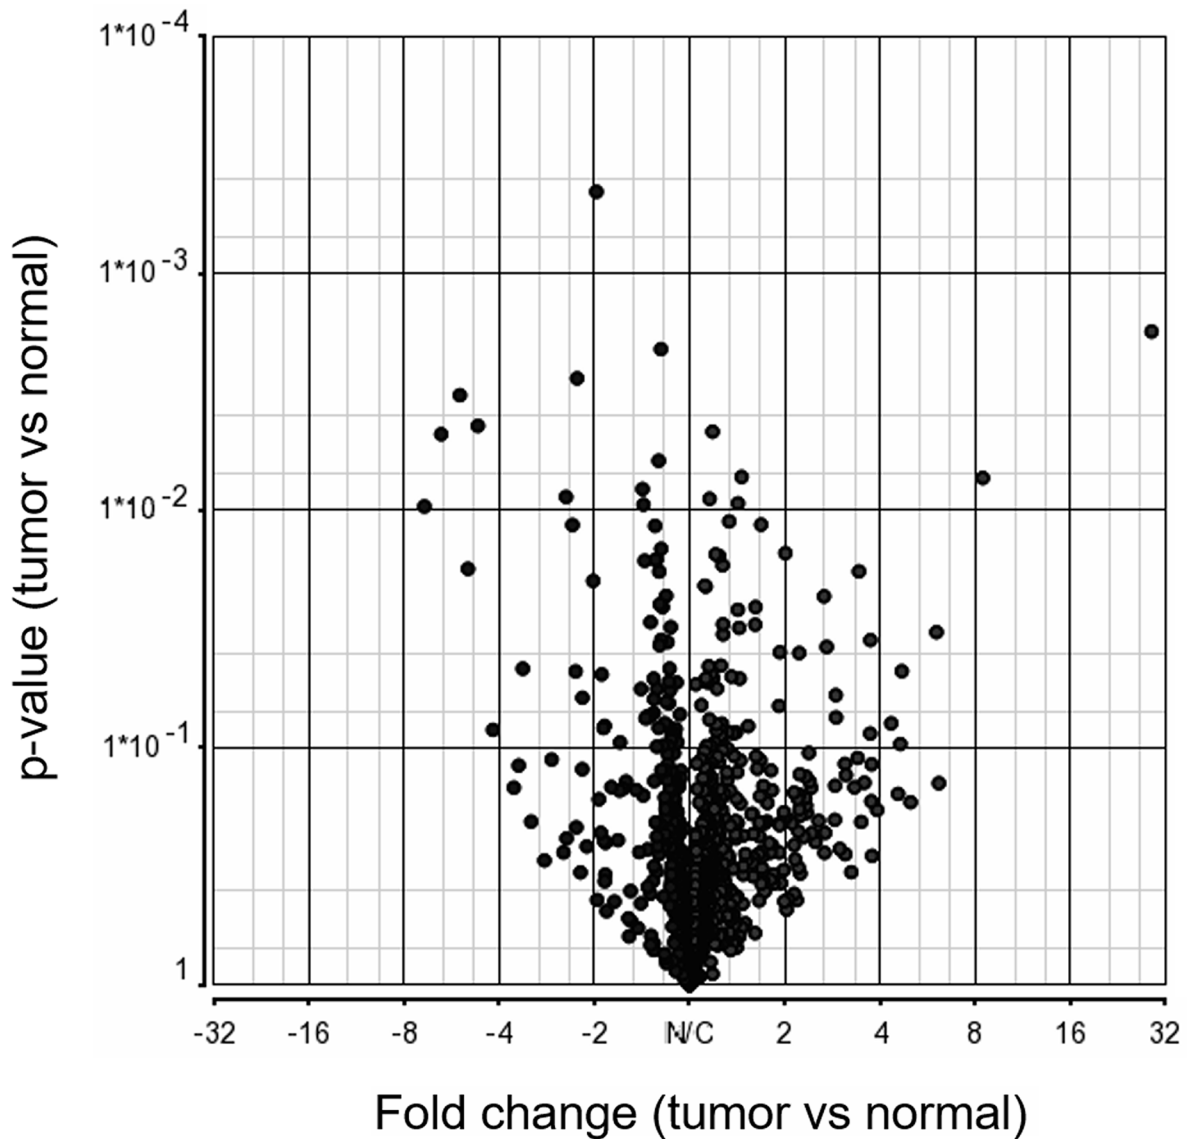

Supplementary Figure 1: A volcano plot represents the differentially expressed miRNAs in urinary EVs.

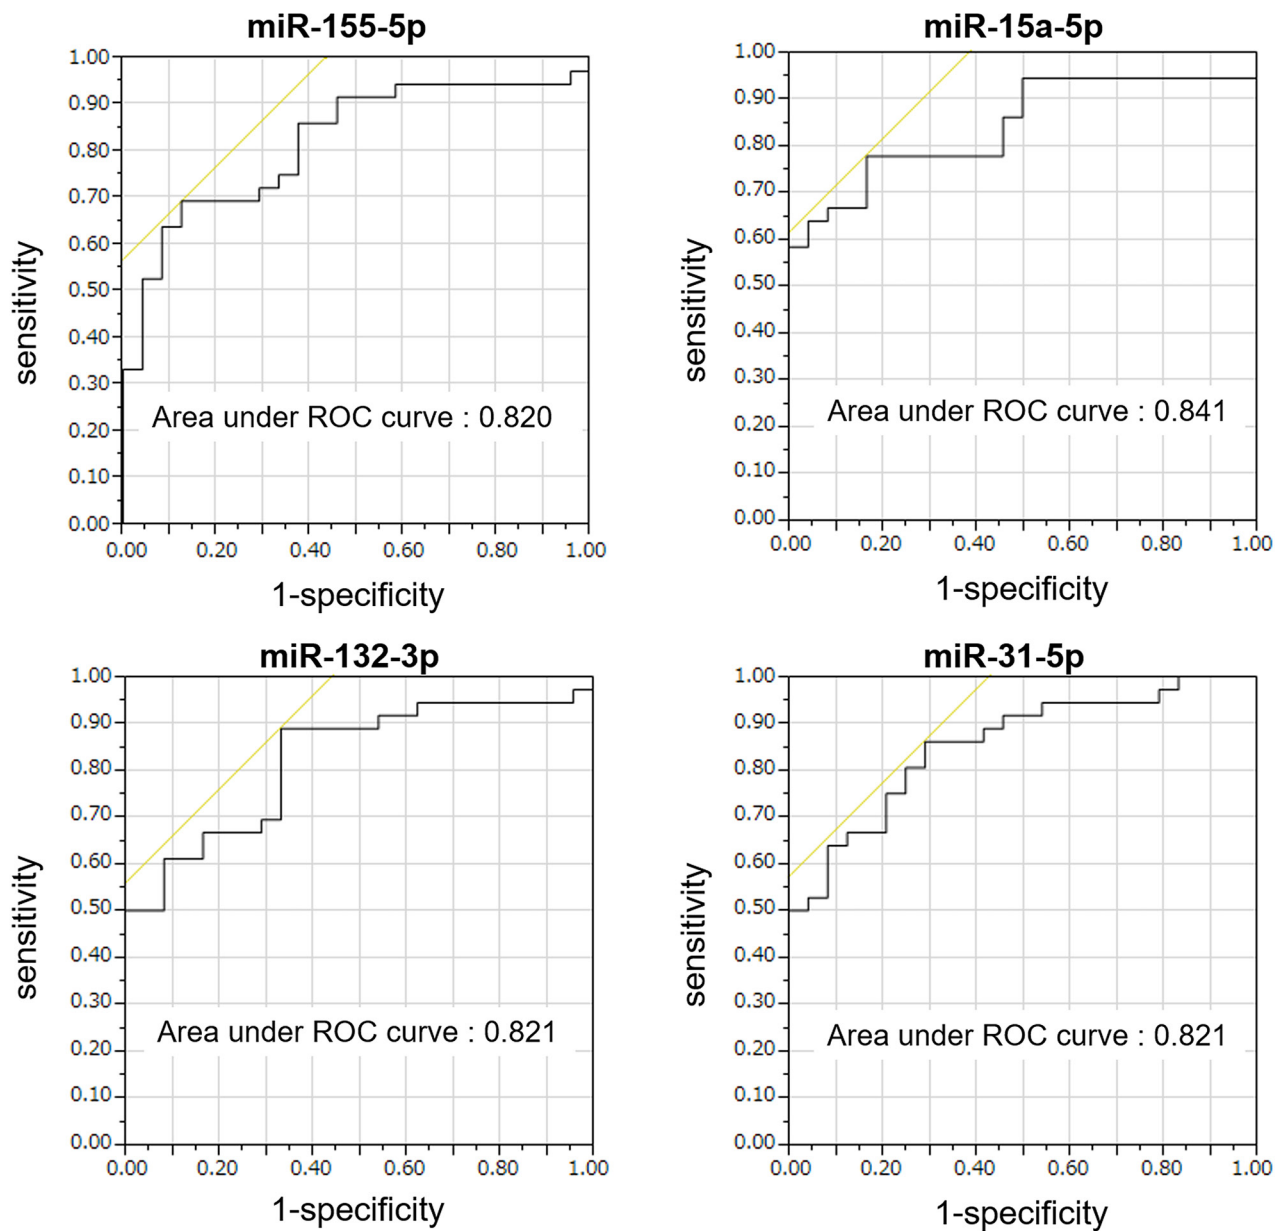

Supplementary Figure 2: ROC curve analysis using other 4 miRNAs in urinary EVs (miR-155-5p, miR-15a-5p, miR-132-3p and miR-31-5p).

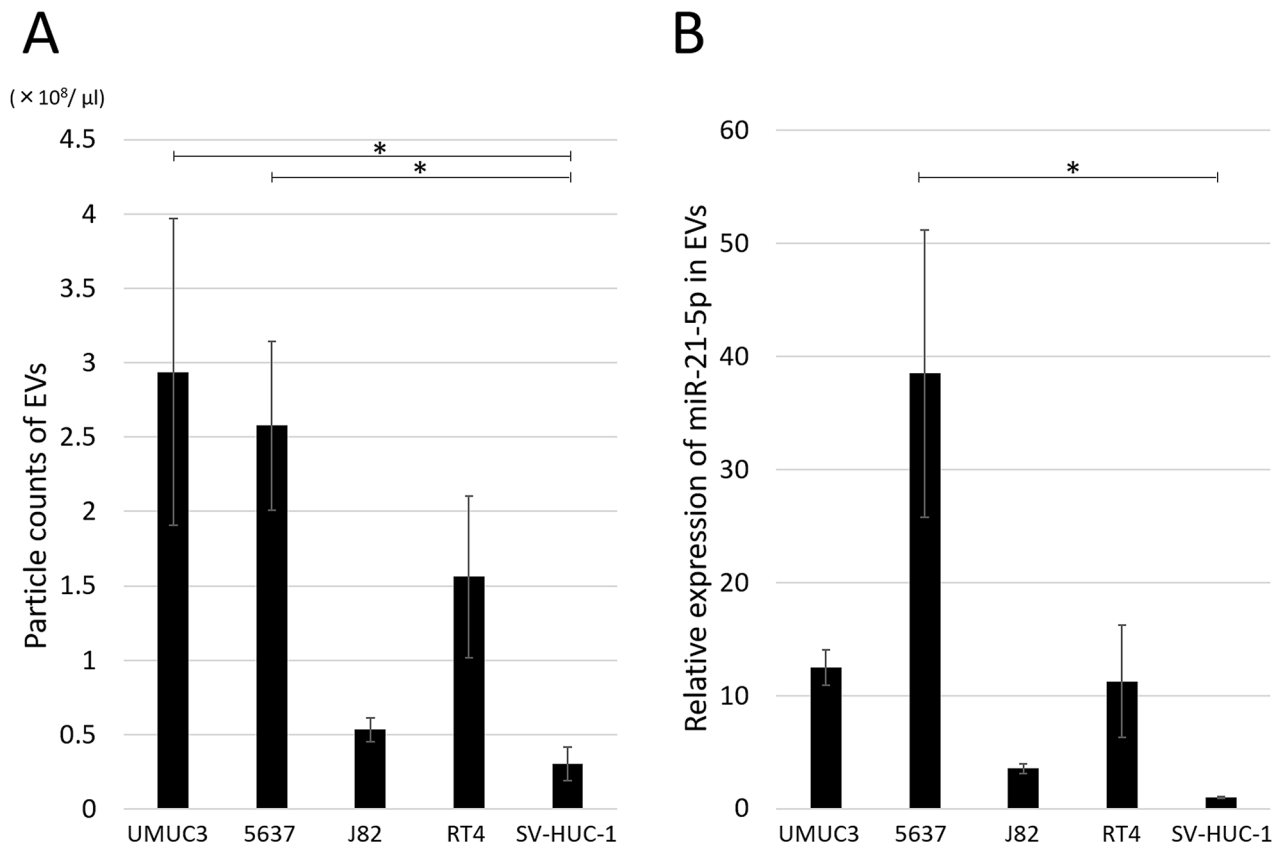

**Supplementary Figure 3: A.** The counts of EVs secreted from each cell lines (UMUC3, 5637, J82, RT4 and SV-HUC-1). **B.** The expression level of miR-21-5p in EVs secreted from each cell lines. Data are mean  $\pm$  S.E. of 3 independent experiments. \* $p < 0.05$ .
